# Supplementary material for: INTS7–ABCD3 Interaction Stimulates the Proliferation and Osteoblastic Differentiation of Mouse Bone Marrow Mesenchymal Stem Cells by Suppressing Oxidative Stress
Source: Front Physiol. 2021 Nov 22;12:758607. doi: 10.3389/fphys.2021.758607 (PMC8647813; doi:10.3389/fphys.2021.758607)
Supplement: Supplementary file 1 [file Table_1.XLSX]

## Sheet: Sheet1
Supplementary Table 1: The list of primer sequences.
Gene	Forward (5'->3')	Reverse (5'->3')	Product length (bp)
Runx2	TCGGAGAGGTACCAGATGGG	TGAAACTCTTGCCTCGTCCG	159
Ocn	TTCTGCTCACTCTGCTGACC	GGGACTGAGGCTCCAAGGTA	154
Alp	TGGTCACAGCAGTTGGTAGC	TGACGTTCCGATCCTGAGTG	101
Osx	AGTGGGAACAAGAGTGAGCTG	TAGTGAGCTTCTTCCTGGGT	145
Pparγ	GTCACACTCTGACAGGAGCC	CACCGCTTCTTTCAAATCTTGT	122
Cebpα	CTAGGAGATTCCGGTGTGGC	CCCGAGAGGAAGCAGGAATC	283
Adipsin	GTGCAAGTGAACGGCACAC	GTCGTCATCCGTCACTCCATC	99
Sod1	GGAACCATCCACTTCGAGCA	CTGCACTGGTACAGCCTTGT	136
Gpx1	GTTCGGACACCAGAATGGCAA	CAGGAAGGTAAAGAGCGGGT	145
Gpx4	AAAGTCCTAGGAAACGCCCG	GCACACGAAACCCCTGTACT	272
Txnrd1	AGAGCTGGTGGTTTCACCTTC	TTTTTGTTCGGCTTCAGGGC	148
Cat	GTGCCCCCAACTATTACCCC	AGAATGTCCGCACCTGAGTG	141
Abcd3	ACATCCTTGAGCGAGAAGGC	GGTGATGCCAACCTTTCGAC	200
Hdlbp	AAGAGCGGAGCCAACATCAA	CCTTGGTGCGCTCATTTTCC	175
18s rRNA	AAACGGCTACCACATCCAAG	CCTCCAATGGATCCTCGTTA	155
