# Supplementary material for: INTS7–ABCD3 Interaction Stimulates the Proliferation and Osteoblastic Differentiation of Mouse Bone Marrow Mesenchymal Stem Cells by Suppressing Oxidative Stress
Source: Front Physiol. 2021 Nov 22;12:758607. doi: 10.3389/fphys.2021.758607 (PMC8647813; doi:10.3389/fphys.2021.758607)
Supplement: Supplementary file 2 [file Table_2.XLSX]

## Sheet: Replicates 1
Supplementary Table 2: The list of identified proteins.
Protein IDs	Peptide counts	Protein names	Gene names	iBAQ IgG	iBAQ INTS7
Q9D8E6	11	60S ribosomal protein L4	Rpl4	0	2684000
Q8BH93;A0A2I3BRS9	1;1	MAPK-interacting and spindle-stabilizing protein-like	Mapk1ip1l	0	812120
A0A0R4J0E4;Q7TQK1;Q7TQK1-2	14;14;7	Integrator complex subunit 7	Ints7	0	731900
Q6XLQ8	7		Calu	0	525400
P35980;A0A1B0GQU8;A0A1B0GSS8;A0A1B0GSF7	2;2;2;2	60S ribosomal protein L18	Rpl18	0	484480
P62960;Q9JKB3;Q9JKB3-2;A2BGG7	2;1;1;1	Nuclease-sensitive element-binding protein 1;DNA-binding protein A	Ybx1;Csda	0	483900
P62751	2	60S ribosomal protein L23a	Rpl23a	0	406690
Q9ERU3	3	Zinc finger protein 22	Znf22	0	341510
Q8BG17	1	Nucleolar protein 12	Nol12	0	262550
Q792Z1	1		Try10	0	260040
Q9QXE7	4	F-box-like/WD repeat-containing protein TBL1X	Tbl1x	0	207540
Q9JKN1	1	Zinc transporter 7	Slc30a7	0	192210
Q9D050;Q791V5;A2AFW6;D6RCZ1	3;3;3;1	Mitochondrial carrier homolog 2	Mtch2	0	189030
Q9CPW3	1	39S ribosomal protein L54, mitochondrial	Mrpl54	0	186600
Q8R105	1	Vacuolar protein sorting-associated protein 37C	Vps37c	0	184070
Q8BKI2;A0A2I3BRG1;Q8BKI2-2	2;1;1	Trinucleotide repeat-containing gene 6B protein	Tnrc6b	0	172710
P12382;P47857-3;P47857-2;P47857;Q8C605;Q9WUA3;Q9WUA3-2;A0A1W2P7T1	4;2;2;2;1;1;1;1	6-phosphofructokinase, liver type;6-phosphofructokinase, muscle type	Pfkl;Pfkm	0	141600
Q8C3F2;Q8C3F2-3;Q8C3F2-2	3;3;1	Constitutive coactivator of PPAR-gamma-like protein 2	Fam120c	0	125850
Q9CR67;A0A0R4J1Z3;Q9CZM3	1;1;1	Transmembrane protein 33	Tmem33	0	109350
P63037	1	DnaJ homolog subfamily A member 1	Dnaja1	0	99471
Q91V61;Q91V61-2;Q3U4F0	2;2;2	Sideroflexin-3	Sfxn3	0	96443
A0A2R8VK76;Q9EPU4	4;4	Cleavage and polyadenylation specificity factor subunit 1	Cpsf1	0	79353
A0A2I3BR81;A0A2I3BRL0;A0A2I3BQR1;Q91X76	2;2;2;2		Nt5dc2	0	70997
Q8CGP2-2;Q8CBB6;P10853;P10854;Q64475;Q64478;Q64524;Q64525;Q6ZWY9;Q8CGP0;Q8CGP1;Q8CGP2;Q9D2U9	1;1;1;1;1;1;1;1;1;1;1;1;1	Histone H2B;Histone H2B type 1-F/J/L;Histone H2B type 1-M;Histone H2B type 1-B;Histone H2B type 1-H;Histone H2B type 2-E;Histone H2B type 2-B;Histone H2B type 1-C/E/G;Histone H2B type 3-B;Histone H2B type 1-K;Histone H2B type 1-P;Histone H2B type 3-A	Gm13646;Hist1h2bf;Hist1h2bm;Hist1h2bb;Hist1h2bh;Hist2h2be;Hist2h2bb;Hist1h2bc;Hist3h2bb;Hist1h2bk;Hist1h2bp;Hist3h2ba	0	70176
Q3U9G9;A0A0A6YY12	2;1	Lamin-B receptor	Lbr	0	68858
O35126	2	Atrophin-1	Atn1	0	67315
O70194	2	Eukaryotic translation initiation factor 3 subunit D	Eif3d	0	67150
Q6NXL1	2		Sec24d	0	67131
P55096;A0A0G2JDI9	2;2	ATP-binding cassette sub-family D member 3	Abcd3	0	62125
Q9D0M2	1	Cell division cycle-associated protein 7	Cdca7	0	61737
Q61990;B2M1R7;Q61990-3;A0A2R8VHP9;Q61990-2;Q3TT81;A0A2R8VI25;A0A2R8VI12;A0A2R8VI73;A0A2R8VKN0;A0A2R8VHY9;A0A2R8VI71;A0A2R8VHZ0;A0A2R8W6L5;A0A2R8VJY1;A0A2R8VKF0;A0A2R8VHG2;A0A2R8VHN3;P57722;P57722-2;A0A2R8W6U6;E9Q7D8;A0A2R8VHL8;A0A2R8VI15;A0A2R8VI92;A0A2R8VHI3	2;2;2;2;2;2;2;2;2;2;2;2;2;2;2;2;2;2;1;1;1;1;1;1;1;1	Poly(rC)-binding protein 2;Poly(rC)-binding protein 3	Pcbp2;Pcbp3	0	54914
Q922J9-4;Q922J9;Q922J9-3;Q922J9-2;D3Z4N9;D3Z5W6;D3Z072	1;1;1;1;1;1;1	Fatty acyl-CoA reductase 1	Far1	0	54556
Q9JJ80;G3X926;S4R1Y5;S4R2H5;S4R2R2	2;2;2;2;2	Ribosome production factor 2 homolog	Rpf2	0	48357
Q6ZQ38;D3YWC5	4;1	Cullin-associated NEDD8-dissociated protein 1	Cand1	0	45405
Q8K4L0	3	ATP-dependent RNA helicase DDX54	Ddx54	0	43226
A0A0R4J170;Q3TKT4-2;Q3TKT4;H3BLH0;F2Z4A9;Q6DIC0;H3BJK2;E9QAB8;G3UX35;H3BKN5	3;3;3;3;3;3;3;3;3;1	Transcription activator BRG1;Probable global transcription activator SNF2L2	Smarca4;Smarca2	0	41485
Q99P88;A0A2R8VHH1	2;2	Nuclear pore complex protein Nup155	Nup155	0	39977
P14869;S4R1N1	1;1	60S acidic ribosomal protein P0	Rplp0	0	36635
A2AH85;O08810;G3UZ34;G3UXK8	3;3;3;1	116 kDa U5 small nuclear ribonucleoprotein component	Eftud2	0	35730
O55187;O55187-2	1;1	E3 SUMO-protein ligase CBX4	Cbx4	0	35386
Q8BFY6	1	Peflin	Pef1	0	34755
Q6PHZ5;A0A087WPD2	2;1	Putative RNA-binding protein 15B	Rbm15b	0	34492
Q8VDJ3;A0A087WP83;A0A087WS92;A0A087WPC5;A0A087WQY9;A0A087WPH2	1;1;1;1;1;1	Vigilin	Hdlbp	0	32024
Q9D0B0;F6RTE1	1;1	Serine/arginine-rich splicing factor 9	Srsf9	0	26217
Q3TIX6;A2AJ72;F7AM43;A0A0A6YVV5	1;1;1;1		Fubp3	0	24953
P60122	1	RuvB-like 1	Ruvbl1	0	24415
E9PZY8;A2AIV2;A2AIV2-2	4;4;3	Protein virilizer homolog	1110037F02Rik;Kiaa1429	0	23728
O55222	2	Integrin-linked protein kinase	Ilk	0	22142
A2AIX1;E9QAT4;F7BPW6	2;2;2		Sec16a	0	21702
Q80ZX0;F6VJC5	2;1		Sec24b	0	21398
Q6P5F9	3	Exportin-1	Xpo1	0	21370
Q8R1L4	1	ER lumen protein retaining receptor 3	Kdelr3	0	20650
Q9QXX4	1	Calcium-binding mitochondrial carrier protein Aralar2	Slc25a13	0	18696
B9EJ54;A0A0J9YUD5;E9Q880	3;2;2		Nup205	0	18114
P17012;P23607	1;1	Zinc finger X-chromosomal protein;Zinc finger autosomal protein	Zfx;Zfa	0	17381
Q9CZU3	2	Superkiller viralicidic activity 2-like 2	Skiv2l2	0	17332
P28658	2	Ataxin-10	Atxn10	0	14181
Q8C9B9;Q8C9B9-3;A0A0R4J0L7	2;1;1	Death-inducer obliterator 1	Dido1	0	11236
Q80U78;Q80U78-3;Q80U78-2;Q3TTW5;E9Q6M7;A8WHM8;Q80U78-4	1;1;1;1;1;1;1	Pumilio homolog 1	Pum1	0	10591
A0A0R4J046;P53569	1;1	CCAAT/enhancer-binding protein zeta	Cebpz	0	10135
P47911	1	60S ribosomal protein L6	Rpl6	0	9793.5
Q9DCL9	1	Multifunctional protein ADE2;Phosphoribosylaminoimidazole-succinocarboxamide synthase;Phosphoribosylaminoimidazole carboxylase	Paics	0	9563.9
Q8CGB6-3;Q8CGB6;Q8CGB6-4;A0A2R8VHQ0;Q8CGB6-2	1;1;1;1;1	Tensin-like C1 domain-containing phosphatase	Tenc1	0	9505.8
Q3TVI8	1	Pre-B-cell leukemia transcription factor-interacting protein 1	Pbxip1	0	8525.7
G3X8T2;H3BIW0;Q0P678	1;1;1	Zinc finger CCCH domain-containing protein 18	Zc3h18	0	8512.4
P56480	1	ATP synthase subunit beta, mitochondrial	Atp5b	0	8505.5
Q6ZPR5;Q6ZPR5-4;Q6ZPR5-2;Q6ZPR5-3	1;1;1;1	Sphingomyelin phosphodiesterase 4	Smpd4	0	8418.2
Q8BKH7;Q8BKH7-2;A0A0A6YW60;A0A0A6YVX6	1;1;1;1	Target of rapamycin complex 2 subunit MAPKAP1	Mapkap1	0	7886.8
Q62095;Q3V086;Q61496	26;2;2	ATP-dependent RNA helicase DDX3Y	Ddx3y	0	7503.2
Q6ZQ73	1	Cullin-associated NEDD8-dissociated protein 2	Cand2	0	7331.6
Q9ERR1;Q9CZA6;Q9CZA6-2;Q9CZA6-3;Q9ERR1-2;Q9CZA6-4;F6Q325	1;1;1;1;1;1;1	Nuclear distribution protein nudE-like 1;Nuclear distribution protein nudE homolog 1	Ndel1;Nde1	0	6896
O70230;O70230-2;O70230-3	1;1;1	Zinc finger protein 143	Znf143	0	6219.8
Q6PAL7	1	AT-hook DNA-binding motif-containing protein 1	Ahdc1	0	5986
Q8CGC7	1	Bifunctional glutamate/proline--tRNA ligase;Glutamate--tRNA ligase;Proline--tRNA ligase	Eprs	0	4918.4
Q5SXR6;Q68FD5	2;2	Clathrin heavy chain 1	Cltc	0	4561.8
Q6ZQH8;A2AWI5;F7BCN9;J3JSA4;F2Z4A7	2;1;1;1;1	Nucleoporin NUP188 homolog	Nup188;Phyhd1	0	4482.1
G5E8J4;Q62136;A0A1Y7VNU2;A0A1Y7VKP4;A0A1Y7VNX8	1;1;1;1;1	Tyrosine-protein phosphatase non-receptor type 21	Ptpn21	0	4200.4
Q68FH4;Q8BUU7	1;1	N-acetylgalactosamine kinase	Galk2	0	3514
Q7TPV4	1	Myb-binding protein 1A	Mybbp1a	0	3446
Q99ME2	1	WD repeat-containing protein 6	Wdr6	0	3136
Q8VI75;Q5U4C5;D6RES6	2;1;1	Importin-4	Ipo4	0	2985.1
Q9QXS1;Q9QXS1-2;Q9QXS1-8;Q9QXS1-7;Q9QXS1-6;Q9QXS1-14;Q9QXS1-4;Q9QXS1-16;Q9QXS1-3;Q9QXS1-5;Q9QXS1-13;Q9QXS1-11;Q9QXS1-12;Q9QXS1-9;Q9QXS1-10;Q9QXS1-15;E9Q3W4	1;1;1;1;1;1;1;1;1;1;1;1;1;1;1;1;1	Plectin	Plec	0	2085.9
Q61164	1	Transcriptional repressor CTCF	Ctcf	0	1541.8
Q6ZQ08-4;Q6ZQ08;Q6ZQ08-2;A0A1D5RMJ8;B7ZWL1;A0A1D5RMD8	1;1;1;1;1;1	CCR4-NOT transcription complex subunit 1	Cnot1	0	1146.9
Q80YQ2-2;Q80YQ2;Q80YQ2-3	1;1;1	Mediator of RNA polymerase II transcription subunit 23	Med23	0	314.3
A2ARZ3	1	Fibrous sheath-interacting protein 2	Fsip2	0	182.64

## Sheet: Replicates 2
Supplementary Table 2: The list of identified proteins.
Protein IDs	Peptide counts	Protein names	Gene names	iBAQ IgG	iBAQ INTS7
D6RHM4	1		Tfpt	0	748140
Q8BH93;A0A2I3BRS9	1;1	MAPK-interacting and spindle-stabilizing protein-like	Mapk1ip1l	0	565680
P35980;A0A1B0GQU8;A0A1B0GSS8;A0A1B0GSF7	2;2;2;2	60S ribosomal protein L18	Rpl18	0	244280
Q9DBQ7;Q9DBQ7-3;Q9DBQ7-2	1;1;1	Protein-associating with the carboxyl-terminal domain of ezrin	Scyl3	0	228220
Q8BP92	2	Reticulocalbin-2	Rcn2	0	197620
Q61990;B2M1R7;Q61990-3;A0A2R8VHP9;Q61990-2;Q3TT81;A0A2R8VI25;A0A2R8VI12;A0A2R8VI73;A0A2R8VKN0;A0A2R8VHY9;A0A2R8VI71;A0A2R8VHZ0;A0A2R8VHL8;A0A2R8W6L5;A0A2R8VJY1;A0A2R8VKF0;A0A2R8VHG2;A0A2R8VHN3;A0A2R8W6U6;A0A2R8VI15;A0A2R8VI92;A0A2R8VHI3	2;2;2;2;2;2;2;2;2;2;2;2;2;2;2;2;2;2;2;1;1;1;1	Poly(rC)-binding protein 2	Pcbp2	0	170480
A0A0R4J0E4;Q7TQK1;Q7TQK1-2	7;7;4	Integrator complex subunit 7	Ints7	0	136990
Q8BKS1	1		Gm10330	0	136790
Q9JMD0;Q9JMD0-2;Q9JMD0-3;Q9JMD0-4;Q8CCB2;B1AQG7	1;1;1;1;1;1		Zfp207	0	87387
Q80XP8;D6RG49	1;1	Protein FAM76B	Fam76b	0	43703
A2A5S3;Q9DBE7;Q9Z108;A2A5R8;V9GX87	2;2;2;2;1	Double-stranded RNA-binding protein Staufen homolog 1	Stau1	0	38692
D3Z7P3;D3Z7P3-2;D3Z7P4;F6U529	1;1;1;1	Glutaminase kidney isoform, mitochondrial	Gls	0	37443
Q9Z1M8	1	Protein Red	Ik	0	33705
Q52KC3;P49718	2;2	DNA replication licensing factor MCM5	Mcm5	0	32949
Q8BGD9;B2RWE8	1;1	Eukaryotic translation initiation factor 4B	Eif4b	0	30886
G3UY42;Q8CCS6;Q8CCS6-2;G3UX74	1;1;1;1	Polyadenylate-binding protein 2	Pabpn1	0	30712
Q6DID3	2	Protein SCAF8	Scaf8	0	26566
G3X9Z4;F6UFZ5	2;2		Pcf11	0	22763
A0A0G2JGQ4;P54729	1;1	NEDD8 ultimate buster 1	Nub1	0	21347
O35126	1	Atrophin-1	Atn1	0	16273
Q8VDJ3;A0A087WP83;A0A087WS92;A0A087WPC5;A0A087WQY9;A0A087WPH2	1;1;1;1;1;1	Vigilin	Hdlbp	0	12598
Q9JLV1	1	BAG family molecular chaperone regulator 3	Bag3	0	11917
Q3TIX6;A2AJ72;A0A0A6YY39;A2AJ71;A0A0A6YX76	1;1;1;1;1		Fubp3	0	11124
Q61081	1	Hsp90 co-chaperone Cdc37	Cdc37	0	10553
A2AIX1;E9QAT4	1;1		Sec16a	0	8661.7
Q921F2;Q6VYI4;Q6VYI5;Q8BLD4;Q8R0B4;A0A087WRZ5;A0A087WR97;A0A087WQA5;A0A087WSE4	1;1;1;1;1;1;1;1;1	TAR DNA-binding protein 43	Tardbp	0	7241.5
P55096;A0A0G2JDI9	1;1	ATP-binding cassette sub-family D member 3	Abcd3	0	6680.6
Q62074	1	Protein kinase C iota type	Prkci	0	6159.8
Q61033;Q61029;Q61029-3;Q61029-2;Q61029-4;Q61033-2	1;1;1;1;1;1	Lamina-associated polypeptide 2, isoforms alpha/zeta;Lamina-associated polypeptide 2, isoforms beta/delta/epsilon/gamma	Tmpo	0	5475.2
Q9DB96	1	Neuroguidin	Ngdn	0	4829.6
Q8CI61	1	BAG family molecular chaperone regulator 4	Bag4	0	4614.4
P47738;A0A0G2JEU1;A0A0G2JFQ0	1;1;1	Aldehyde dehydrogenase, mitochondrial	Aldh2	0	3849.1
Q9JKX4;Q9JKX4-3;Q9JKX4-2	1;1;1	Protein AATF	Aatf	0	3416.5
Q9D4H9-2;G5E8S0;Q9D4H9;Q9D4H9-3	1;1;1;1	PHD finger protein 14	Phf14	0	2760.1
Q6ZQ73	1	Cullin-associated NEDD8-dissociated protein 2	Cand2	0	2564
Q8BKH7;Q8BKH7-2;A0A0A6YW60;A0A0A6YVX6	1;1;1;1	Target of rapamycin complex 2 subunit MAPKAP1	Mapkap1	0	2444.9
Q6URW6-3;K3W4R2;Q6URW6;Q6URW6-2;E9QPE7;O08638;Q8VDD5;A0A2R8VHF9;O08638-2	1;1;1;1;1;1;1;1;1	Myosin-14;Myosin-11;Myosin-9	Myh14;Myh11;Myh9	0	2217.9
Q9EPQ8;Q9EPQ8-2	1;1	Transcription factor 20	Tcf20	0	2138.2
A0A140T8S5;Q8K327	1;1	Chromosome alignment-maintaining phosphoprotein 1	Champ1	0	1702.7
O70230;O70230-2;O70230-3	1;1;1	Zinc finger protein 143	Znf143	0	1329.7
Q7TPV4	1	Myb-binding protein 1A	Mybbp1a	0	853.91
Q9EPL8;A0A140LHD0	1;1	Importin-7	Ipo7	0	844.75

## Sheet: Replicates 3
Supplementary Table 2: The list of identified proteins.
Protein IDs	Peptide counts	Protein names	Gene names	iBAQ IgG	iBAQ INTS7
Q60945	1	Protein p13 MTCP-1	Mtcp1	0	318620
A0A0R4J0E4;Q7TQK1;Q7TQK1-2	10;10;5	Integrator complex subunit 7	Ints7	0	288020
O88569;O88569-2;O88569-3;A0A0N4SUM2	2;2;2;1	Heterogeneous nuclear ribonucleoproteins A2/B1	Hnrnpa2b1	0	244270
Q9R0P5	1	Destrin	Dstn	0	183720
F6VW30;F6YY69;P62259;O70456;P61982;P68510;Q9CQV8;P63101;P68254;Q9CQV8-2;P68254-2;A0A2I3BQ03;A2A5N1;F6WA09;D6REF3;D3YXN6	1;1;1;1;1;1;1;1;1;1;1;1;1;1;1;1	14-3-3 protein epsilon;14-3-3 protein sigma;14-3-3 protein gamma;14-3-3 protein gamma, N-terminally processed;14-3-3 protein eta;14-3-3 protein beta/alpha;14-3-3 protein beta/alpha, N-terminally processed;14-3-3 protein zeta/delta;14-3-3 protein theta	Ywhaq;Ywhae;Sfn;Ywhag;Ywhah;Ywhab;Ywhaz	0	141700
Q9D6K7;D3Z767;D3Z1T8;Q9D6K7-2	2;2;1;1	Tetratricopeptide repeat protein 33	Ttc33	0	120680
Q8R105	1	Vacuolar protein sorting-associated protein 37C	Vps37c	0	116380
Q9D6F9	21	Tubulin beta-4A chain	Tubb4a	0	86782
Q9CR67;A0A0R4J1Z3;Q9CZM3	1;1;1	Transmembrane protein 33	Tmem33	0	80259
Q99LI9	1	Polyribonucleotide 5-hydroxyl-kinase Clp1	Clp1	0	56410
Q80XP8;D6RG49	1;1	Protein FAM76B	Fam76b	0	53711
F8VPU2;E9Q805	1;1		Farp1	0	50134
Q8BZ25	1	Ankyrin repeat and protein kinase domain-containing protein 1	Ankk1	0	45306
Q6T264	1	Mastermind-like protein 1	Maml1	0	44264
Q99L88;Q99L88-2	1;1	Beta-1-syntrophin	Sntb1	0	41636
Q8BH59;Q9QXX4	2;1	Calcium-binding mitochondrial carrier protein Aralar1;Calcium-binding mitochondrial carrier protein Aralar2	Slc25a12;Slc25a13	0	37963
P62830	1	60S ribosomal protein L23	Rpl23	0	36428
E9QPD7;G5E8R3;Q05920	1;1;1	Pyruvate carboxylase;Pyruvate carboxylase, mitochondrial	Pcx;Pc	0	29257
D3YXW1;Q9D945;Q9D945-2;A0A1W2P865	1;1;1;1	Protein LLP homolog	Llph	0	28914
E9Q8Z8;E9Q8Z6;E9Q8Z5;P30999;G3X9V2;P30999-3;E9Q904;P30999-2;E9Q901;E9Q903;D3Z2H2;E9Q8Z9;E9Q8Z4;E9Q905;E9Q907;E9Q906;D3Z7H6;E9Q986;D3Z2H7	3;3;3;3;3;3;3;3;3;3;3;3;3;3;3;3;3;3;3	Catenin delta-1	Ctnnd1	0	26463
Q99MZ6	1	Unconventional myosin-VIIb	Myo7b	0	26279
Q99N95;D3Z456;F6W7C7;A0A1L1SU47;A0A087WQU4;D6RI16	1;1;1;1;1;1	39S ribosomal protein L3, mitochondrial	Mrpl3	0	25950
Q8BP47	2	Asparagine--tRNA ligase, cytoplasmic	Nars	0	25361
Q8VDJ3;A0A087WP83;A0A087WS92;A0A087WPC5;A0A087WQY9;A0A087WPH2	1;1;1;1;1;1	Vigilin	Hdlbp	0	24165
Q61990;B2M1R7;Q61990-3;A0A2R8VHP9;Q61990-2;Q3TT81;A0A2R8VI25;A0A2R8VI12;A0A2R8W6U6;A0A2R8VI73;A0A2R8VKN0;A0A2R8VHY9;A0A2R8VI71;A0A2R8VHZ0;A0A2R8VHL8;A0A2R8W6L5;A0A2R8VJY1;A0A2R8VI15;A0A2R8VKF0;A0A2R8VHG2;A0A2R8VI92;A0A2R8VHN3	1;1;1;1;1;1;1;1;1;1;1;1;1;1;1;1;1;1;1;1;1;1	Poly(rC)-binding protein 2	Pcbp2	0	23357
Q3TDD9	1	Protein phosphatase 1 regulatory subunit 21	Ppp1r21	0	20711
Q91W39;B7ZC24;B7ZC23	1;1;1	Nuclear receptor coactivator 5	Ncoa5	0	20284
Q67FY2;Q67FY2-2	1;1	B-cell CLL/lymphoma 9-like protein	Bcl9l	0	19841
P17751;H7BXC3	1;1	Triosephosphate isomerase	Tpi1	0	19738
Q922J9-4;Q922J9;Q922J9-3;Q922J9-2;D3Z4N9;D3Z5W6;D3Z072	1;1;1;1;1;1;1	Fatty acyl-CoA reductase 1	Far1	0	19470
Q61081	1	Hsp90 co-chaperone Cdc37	Cdc37	0	19264
P55096;A0A0G2JDI9	1;1	ATP-binding cassette sub-family D member 3	Abcd3	0	18658
A0A2C9F2D2;Q07076;A0A286YCW4	1;1;1	Annexin A7	Anxa7	0	17934
Q505K2	1	Protein FAM160A1	Fam160a1	0	17591
Q8JZU2	1		Slc25a1	0	17113
P19324	1	Serpin H1	Serpinh1	0	16924
P46978	1	Dolichyl-diphosphooligosaccharide--protein glycosyltransferase subunit STT3A	Stt3a	0	16797
Q6ZQ38	1	Cullin-associated NEDD8-dissociated protein 1	Cand1	0	14617
Q9JLV1	1	BAG family molecular chaperone regulator 3	Bag3	0	11956
P07356;B0V2N7;B0V2N8	1;1;1	Annexin A2;Annexin	Anxa2	0	10490
A0A0R4J0G0;Q8BH04;A0A2I3BS39;A0A2I3BQL9;A0A2I3BRX1;A0A2I3BQC6	1;1;1;1;1;1	Phosphoenolpyruvate carboxykinase [GTP], mitochondrial	Pck2	0	9204.7
P52293	1	Importin subunit alpha-2	Kpna2	0	8115.6
Q3TVI8	1	Pre-B-cell leukemia transcription factor-interacting protein 1	Pbxip1	0	6578.3
A0A2I3BR81;A0A2I3BRL0;A0A2I3BQR1;Q91X76	1;1;1;1		Nt5dc2	0	6400.7
Q8C0C7;E9PWY9;D6RIJ2	1;1;1	Phenylalanine--tRNA ligase alpha subunit	Farsa	0	5429.2
Q9JKX4;Q9JKX4-3;Q9JKX4-2	1;1;1	Protein AATF	Aatf	0	4827.6
Q8BVY0;A0A2R8VHW2	1;1		Rsl1d1	0	4352.2
Q8R0G9	1	Nuclear pore complex protein Nup133	Nup133	0	3836.9
Q9EPU0;Q9EPU0-2	1;1	Regulator of nonsense transcripts 1	Upf1	0	3639.7
Q6ZPR5;Q6ZPR5-4;Q6ZPR5-2;Q6ZPR5-3	1;1;1;1	Sphingomyelin phosphodiesterase 4	Smpd4	0	3436.5
P24788;A2A9P6;P24788-2	1;1;1	Cyclin-dependent kinase 11B	Cdk11b	0	3392.7
P28658	1	Ataxin-10	Atxn10	0	3040.4
Q8BMK4	1	Cytoskeleton-associated protein 4	Ckap4	0	2577.1
Q9EPQ8;Q9EPQ8-2	1;1	Transcription factor 20	Tcf20	0	2489
Q11011;E9Q039;F6QYF8	1;1;1	Puromycin-sensitive aminopeptidase	Npepps	0	2455.7
Q8BKC5;Q8BKC5-2	1;1	Importin-5	Ipo5	0	1596.4
Q80X98	1		Dhx38	0	1542
P27046	1	Alpha-mannosidase 2	Man2a1	0	1427.9
P58854	1	Gamma-tubulin complex component 3	Tubgcp3	0	996.65
Q61164	1	Transcriptional repressor CTCF	Ctcf	0	608.82
Q9WU78-3;Q9WU78;Q9WU78-2	1;1;1	Programmed cell death 6-interacting protein	Pdcd6ip	0	598.17
E9Q392;Q9QXK2;D3Z733;D3Z734	1;1;1;1	E3 ubiquitin-protein ligase RAD18	Rad18	0	488.12
F6WJB7;Q6ZQ93;Q6ZQ93-2;Q6ZQ93-3;Q6ZQ93-4	1;1;1;1;1	Ubiquitin carboxyl-terminal hydrolase;Ubiquitin carboxyl-terminal hydrolase 34	Usp34	0	310.69
